# MIND TO MIND

Creative writing that explores the abstract side of our profession and our lives

*Stephen T. Harvey, M.D., Editor*

## Lumbar Puncture

Nisa Malli

P Present your spine to the resident  
and his audience of almost-  
doctors, next year's earnest needle-  
wielders, sweet-  
faced believers in science, interns here  
to learn the precise  
point of entry for a surface  
wound. Percutaneous means through  
the skin but this is bone-  
deep, not puncture but punch, more  
pain than most of them will know  
in their lives of prescriptive  
call and answer. The doctors are more scared  
than you. Things can happen at the blind  
head of a needle, in the laying  
of hands, in an open-  
faced excavation. The interns race  
each other to name the risks:  
headaches, herniation, hematomas, tonsillar  
descent. This is how they find your fused  
lumbar—three tries in, the topical  
worn off, the experts unsure  
why you're resisting  
being pinned—here is  
the cause of your shallow  
grand pli  , your unwillingness  
to be bent like a bird's wing.

This poem is one of the finalists of ANESTHESIOLOGY's 2019 annual creative writing competition, The Letheon. malli.nisa@gmail.com.

Accepted for publication March 9, 2020. Published online first on April 3, 2020.

Permission to reprint granted to the American Society of Anesthesiologists, Inc. by copyright author/owner. Anesthesiology 2020; 132:1586. DOI: 10.1097/ALN.0000000000003297
